# Supplementary material
Source: Springer Nature journal article supplement (http://www.springermedizin.de/resource/supplementary/13049_2010_179_MOESM2_ESM.pdf/9666042)

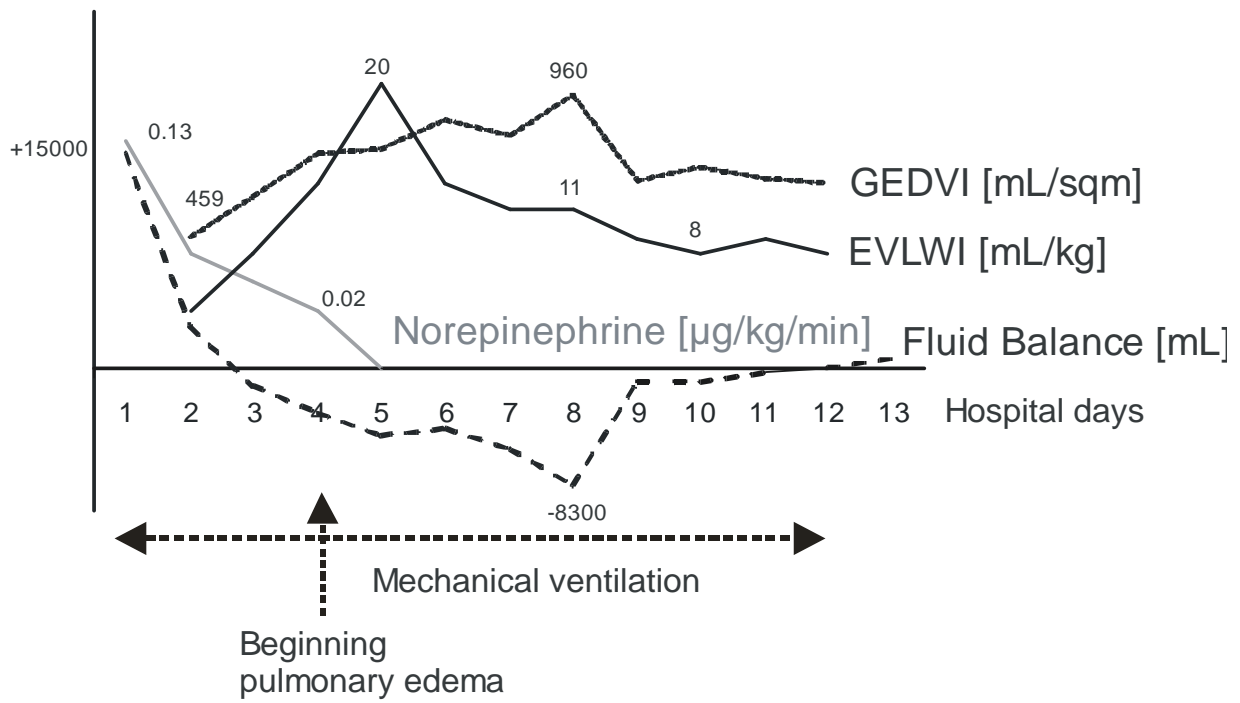

Supplement: MOESM2 [file 9666042]
